# Supplementary material
Source: PubMed Central journal article supplement (PMC3811817)
Supplement: IAI.00521-13_zii999090366so1.pdf [file IAI.00521-13_zii999090366so1.pdf]

1 **Supplemental Figure 1** - Chymotrypsin has a negative effect on IApc35 and BC2 biofilms, and  
2 this effect is abrogated by either complementation with *mrkDIP* or the addition of  
3 antichymotrypsin. **A.** IA565, IApc35, and BC2 biofilms were treated with chymotrypsin with  
4 and without the addition of antichymotrypsin. Biofilm formation was measured as described  
5 above. **B.** Biofilms of IA565 and IApc35 or BC2 (carrying pBMC12 or pBMC13) were  
6 preformed in YEPD in 96-well microtiter plates at 37°C with shaking, and were treated after 16  
7 hours by replacing the media with fresh YEPD or YEPD supplemented with the chymotrypsin in  
8 the presence or absence of antichymotrypsin. Biofilm formation was measured after 16 hours by  
9 staining with crystal violet and measurement at OD<sub>570</sub>.

10 **Supplemental Figure 2** - Scanning electron micrographs illustrating mean cell length of *K.*  
11 *pneumoniae* wildtype strain IA565 (**A**), BC2-pBMC12 (**B**) and BC2-pBMC13 (**C**).

12 **Supplemental Figure 3** – Effect of PAO1 supernatant on the monospecies biofilms of various  
13 strains of *K. pneumoniae* carrying *mrkDIP* or *mrkDIC*. Supernatants derived from PAO1 or the  
14  $\Delta$ *lasB* transposon mutant of PAO1 were used to treat each strain of *K. pneumoniae*, after 16  
15 hours of biofilm growth. Biofilm formation was measured after 16 hours by staining with crystal  
16 violet and measurement at OD<sub>570</sub>.

17 **Supplemental Figure 4** - Strains of *K. pneumoniae* carrying various combinations of *mrkDIC*  
18 and *mrkDIP* are not defective for planktonic growth. Growth of planktonic *K.pneumoniae* was  
19 measured in the presence of YEPD in 96-well microtiter plates at 37°C with shaking. Readings  
20 were taken at OD<sub>600</sub> every hour.

21

22

23

24 **Supp. Fig. 1**

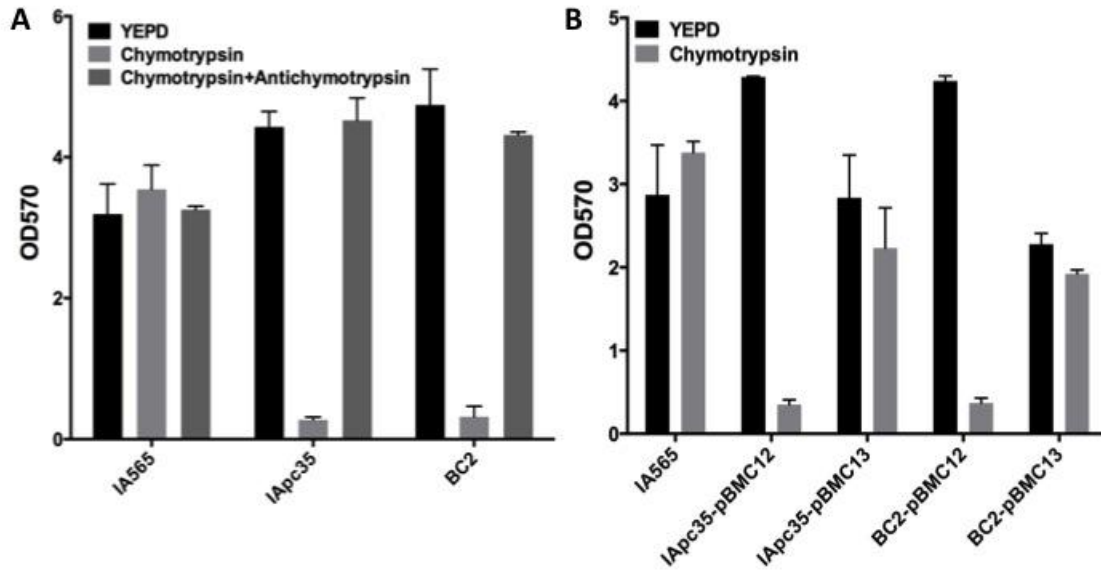

25

26

27

28

29

30 **Supp. Fig. 2**

31

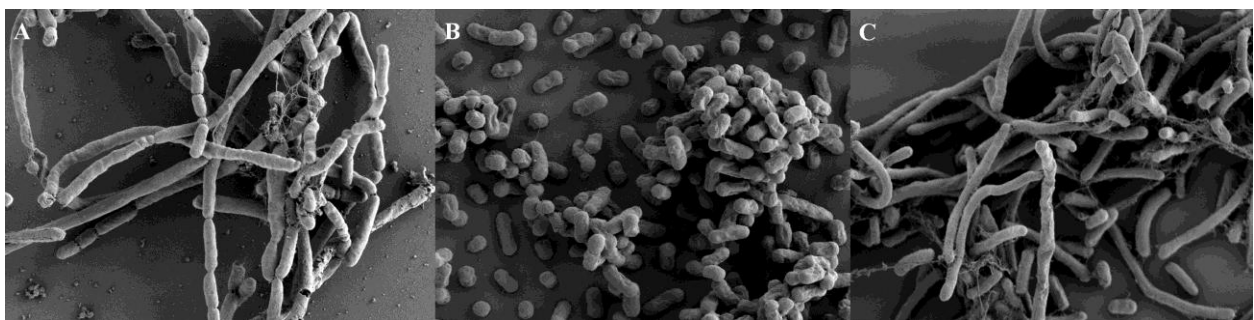

32

33

34

35

36

37 Supp. Fig. 3

38

39

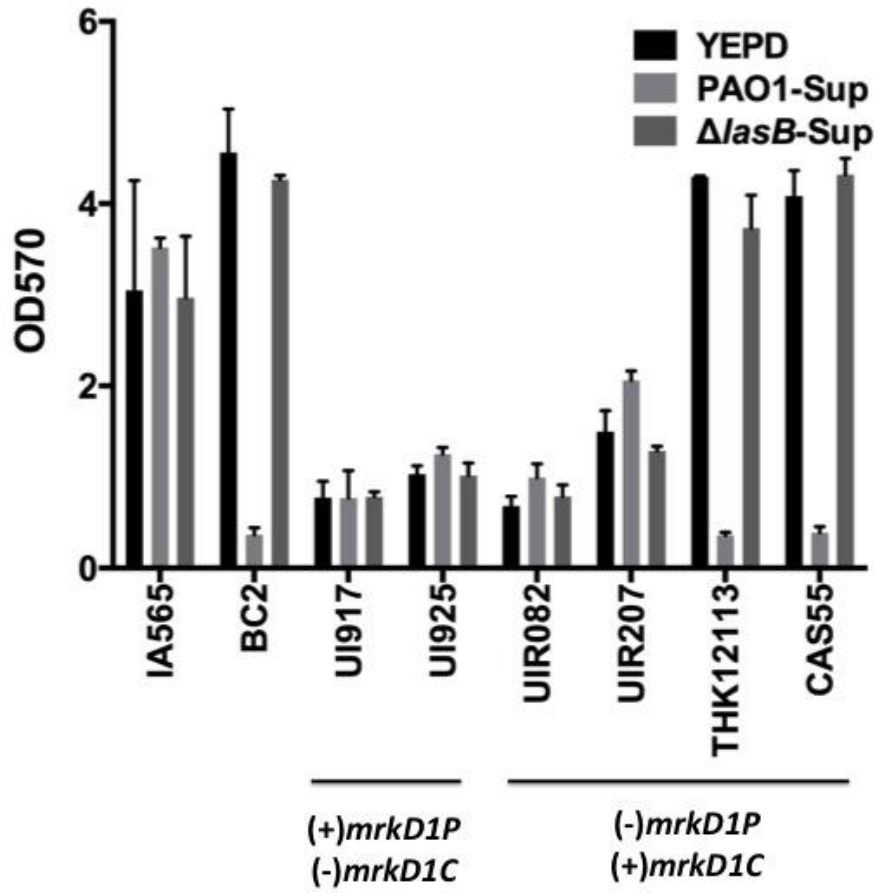

40

41

42

43

44

45

46

47

48

49 Supp. Fig. 4

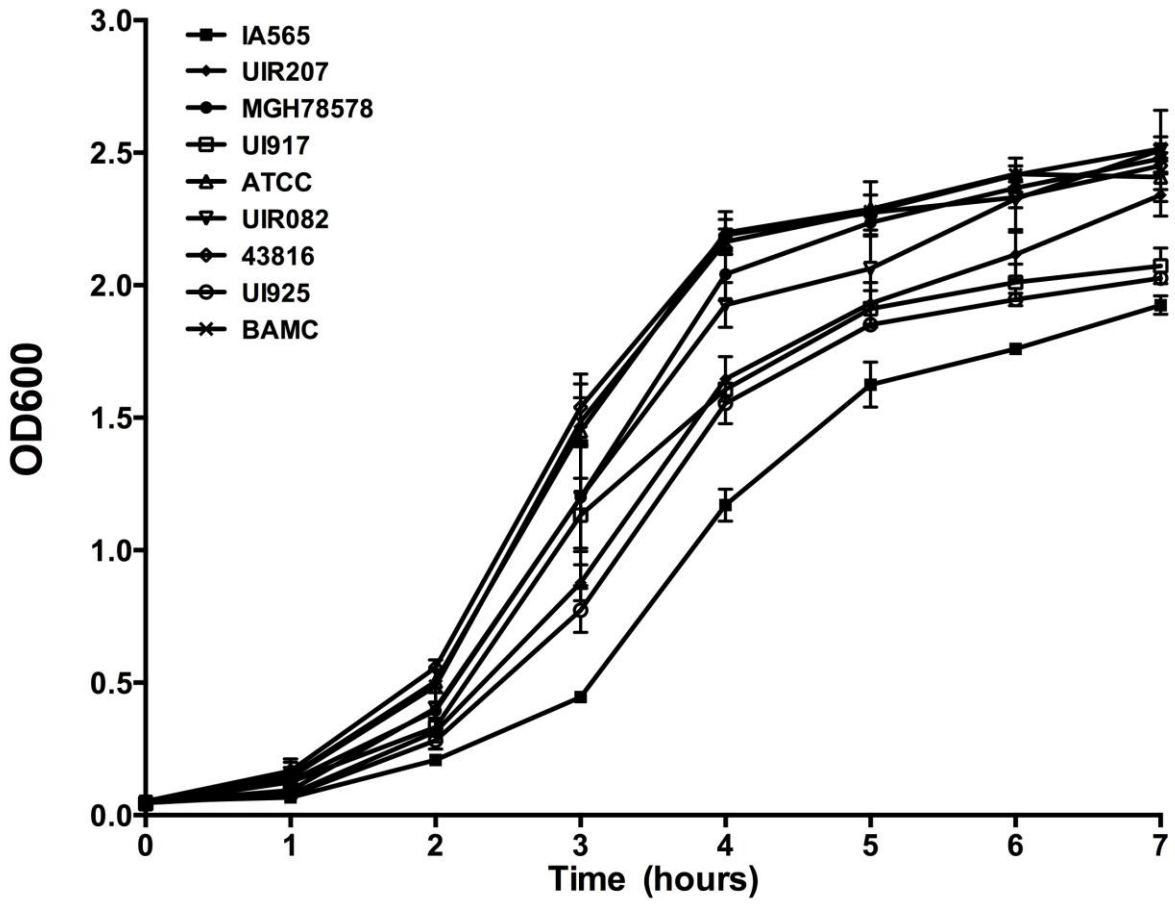

50
